# Supplementary material
Source: Royal Society of Chemistry journal article supplement (doi:10.1039/d6ay00468g)
Supplement: d6ay00468g1.pdf [file d6ay00468g1.pdf]

Supplementary information

Poly-Thymine-Mediated Fluorescence Recovery of N-CQDs for Turn-On Sensing of APE1  
Activity in Breast Cancer Cell Lysates

Xinjuan Xiong<sup>1</sup>, Yanning Li<sup>1</sup>, Minghui Zhao<sup>1</sup>, Juan Zhao<sup>1</sup>, Shulong Xiong<sup>2</sup>, Zhao Sun<sup>1\*</sup>

<sup>1</sup> Department of Thyroid and Breast Surgery, The 960th Hospital of the PLA Joint Logistics Support Force, Jinan, 250031, China.

<sup>2</sup> Hunan Academy of Chinese Medicine, Changsha, 410208, China.

Corresponding Author: Zhao Sun

Email: sunzhao1022@163.com

## Materials and Reagents

Silver nitrate ( $\text{AgNO}_3$ ) and other metal salts ( $\text{NaCl}$ ,  $\text{KCl}$ ,  $\text{MgCl}_2$ ,  $\text{CaCl}_2$ ,  $\text{ZnCl}_2$ ,  $\text{CuCl}_2$ ,  $\text{FeCl}_3$ ) were purchased from Sigma-Aldrich. Fetal bovine serum (FBS) and cell culture media were from Gibco. All enzymes-including Apurinic/aprimidinic endonuclease 1 (APE1), DNase I, Exonuclease III, Endonuclease IV, Alkaline Phosphatase (ALP), and Trypsin-as well as Bovine Serum Albumin (BSA) were sourced from New England Biolabs. The DNA probes T1 and T2 were synthesized and HPLC-purified by Sangon Biotech (Shanghai). Tris-HCl buffer, and RIPA lysis buffer were obtained from Thermo Fisher Scientific. All solutions were prepared using deionized water ( $18.2 \text{ M}\Omega\cdot\text{cm}$ , Milli-Q).

## Instrumentation

The UV absorption and fluorescence spectra were recorded using a UV-1800 UV-vis spectrophotometer (Shimadzu, Japan) and a FL-2500 Fluorescent Photometer (Hitachi, Japan), respectively. N-CQDs was characterized using high resolution transmission electron microscopy (HR-TEM) at an accelerating voltage of 200 kV (JEOL Co., Japan). Energy-dispersive X-ray spectroscopy (EDS) analysis of N-CQDs was performed using a JEM-F200 TEM at an accelerating voltage of 200 kV (JEOL Co., Japan). X-ray photoelectron spectroscopy (XPS) images of N-CQDs and  $\text{Ag}^+$  + N-CQDs were obtained using an AXIS SUPRA+ spectrometer (Shimadzu, UK). Sample preparation was carried out using a constant temperature oscillating metal bath incubator (MB-102, Hangzhou, China).

## Synthesis of N-CQDs

N-doped carbon quantum dots (N-CQDs) were synthesized via a one-pot hydrothermal method. Briefly, 2.0 g of washed and dried castor seeds were ground into powder, dispersed in 30 mL deionized water, and sonicated to form a homogeneous suspension. The mixture was transferred into a Teflon-lined autoclave and heated at  $180^\circ\text{C}$  for 10 h. After cooling, the resulting solution was centrifuged and filtered through a  $0.22 \mu\text{m}$  membrane. The filtrate was dialyzed (MWCO: 1000 Da) against water for 48 h to remove small molecules. The purified N-CQDs solution was stored at  $4^\circ\text{C}$  for further use.

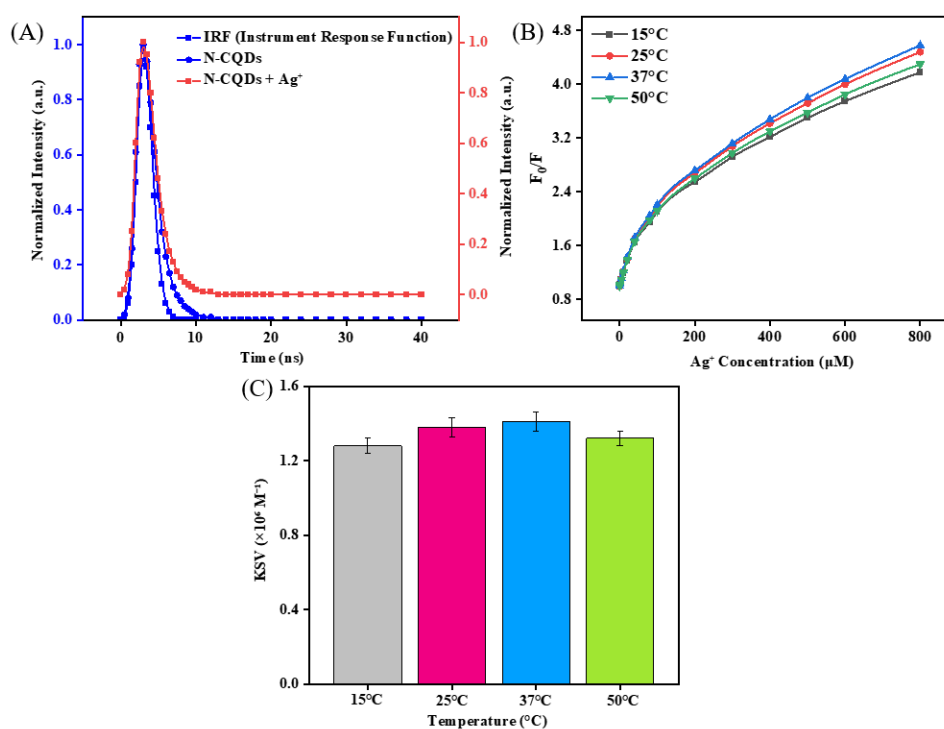

Figure S1. Mechanistic investigation of the inner filter effect (IFE). (A) Time-resolved fluorescence decay curves of N-CQDs in the absence (blue) and presence (red) of  $\text{Ag}^+$ . The instrument response function (IRF, gray dashed line) is shown for reference. The average fluorescence lifetimes were determined to be  $6.42 \pm 0.15$  ns for N-CQDs alone and  $6.38 \pm 0.18$  ns for N-CQDs with  $\text{Ag}^+$ . No significant change in lifetime was observed, supporting the IFE mechanism. (B) Stern-Volmer plots of N-CQDs quenched by  $\text{Ag}^+$  at different temperatures (15, 25, 37, and 50 °C). (C) Corresponding Stern-Volmer quenching constants ( $K_{\text{SV}}$ ) at different temperatures. The  $K_{\text{SV}}$  values remained relatively stable across the temperature range ( $1.28$ - $1.41 \times 10^6 \text{ M}^{-1}$ ), showing no significant temperature-dependent increase or decrease, which is characteristic of the IFE.

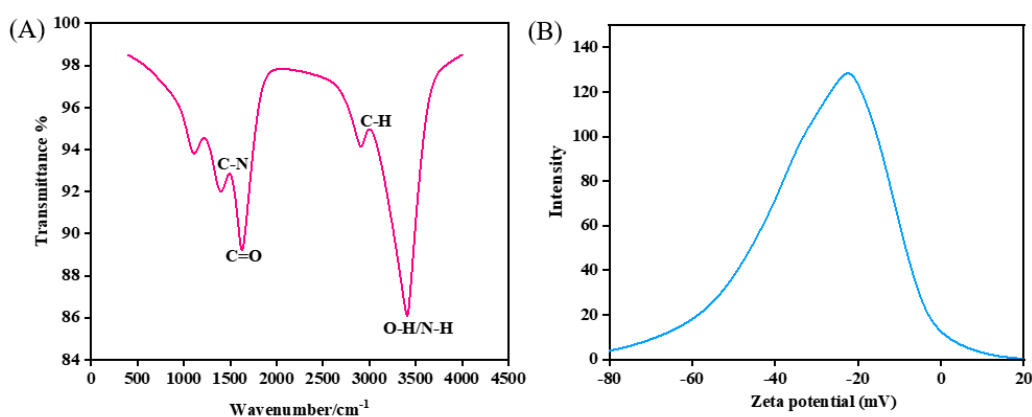

Figure S2. (A) FTIR spectrum of N-CQDs. Characteristic peaks at  $3420 \text{ cm}^{-1}$  (O-H/N-H stretching),  $1635 \text{ cm}^{-1}$  (C=O stretching),  $1402 \text{ cm}^{-1}$  (C-N stretching), confirm the surface functional groups. (B) Zeta potential distribution of N-CQDs in water, showing a mean value of  $22.4 \pm 3.1$  mV.

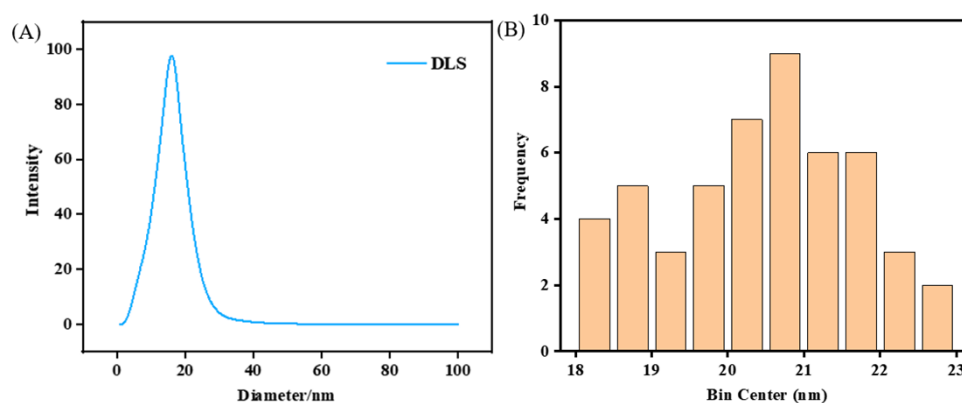

Figure S3. (A) Dynamic light scattering (DLS) intensity-weighted size distribution of N-CQDs in water, showing a mean hydrodynamic diameter of 15.8 nm (PDI=0.18). (B) Size distribution histogram of N-CQDs obtained from TEM images ( $n=50$ ), giving an average diameter of  $20.1 \pm 1.2$  nm. The results confirm the nanoscale size and good monodispersity of the N-CQDs.

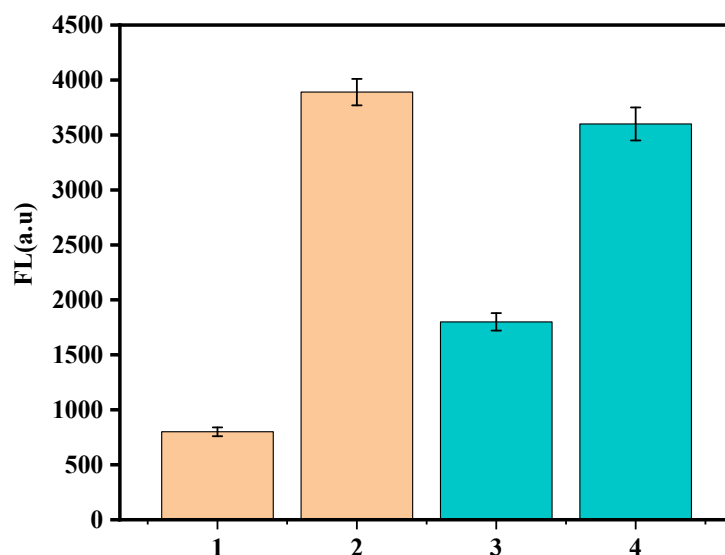

Figure S4. Effect of magnetic beads (MB) on the fluorescence response of the biosensor. Four conditions were compared: (1) MB + no APE1-probe immobilized on magnetic beads, no APE1 added (background control); (2) MB + APE1-probe on beads with APE1 (signal); (3) No MB + no APE1- free probe in solution without APE1 (background without MB); (4) No MB + APE1-free probe with APE1 (signal without MB). Fluorescence intensities were measured at 450 nm. Data are presented as mean  $\pm$  SD (n = 3). The signal-to-background ratios were 4.86 (3890/800) for the MB-assisted system and 2.00 (3600/1800) without MB. The use of MBs significantly reduced background fluorescence (800 vs. 1800) and provided a clear “OFF-to-ON” response. Without MBs, the high background and poor signal-to-background ratio would lead to false-positive results, demonstrating that MBs are essential for reliable APE1 detection.

**Table S1.** DNA sequences (5'-3') utilized in this work. (X represent AP site).

| Strand | Sequence (5'-3')                |
|--------|---------------------------------|
| T1     | Biotin-CAGTCACTCGATCCAATCTACAGC |
| T2     | TTGGATCGAXT <sub>(30)</sub>     |

**Table S2.** Recovery of APE1 in fetal bovine serum (FBS)

| Spiked (U/mL) | Found (U/mL) | Recovery (%) | RSD (%) (n=3) |
|---------------|--------------|--------------|---------------|
| 0.06          | 0.058        | 96.67        | 6.3           |
| 0.5           | 0.46         | 92.01        | 4.8           |
| 2             | 2.15         | 107.5        | 3.5           |

**Table S3.** Comparison of the proposed biosensor with previously reported APE1 detection methods

| Method       | Principle  | LOD (U/mL) | Label-Free | One-Step | Cell Lysate | Ref. |
|--------------|------------|------------|------------|----------|-------------|------|
| DNA walker + | 3D bipedal | 0.03       | No         | No       | Yes         | [S1] |

| Method                    | Principle                                                  | LOD (U/mL)            | Label-Free | One-Step   | Cell Lysate | Ref. |
|---------------------------|------------------------------------------------------------|-----------------------|------------|------------|-------------|------|
| Exo III                   | DNA walker on AuNP                                         |                       |            |            |             |      |
| Localized Cas12a-CA       | Cas12a cascade on AuNP                                     | $2.51 \times 10^{-6}$ | No         | Yes        | Yes         | [S2] |
| FAC-HCR                   | Aptamer-based HCR                                          | 0.1174                | Yes        | No         | Yes         | [S3] |
| rGO + hairpin probe       | rGO adsorption + FAM                                       | 0.02                  | No         | Yes        | Yes         | [S4] |
| FRET + magnetic beads     | FAM/BHQ1 FRET, MB separation                               | 0.03                  | No         | No         | Yes         | [S5] |
| Closed cyclic DNA machine | HCR + CHA closed circuit                                   | $7.8 \times 10^{-5}$  | No         | No         | Yes         | [S6] |
| <b>This work</b>          | <b>N-CQDs + Ag<sup>+</sup> + APE1-gated poly-T release</b> | <b>0.02</b>           | <b>Yes</b> | <b>Yes</b> | <b>Yes</b>  |      |

Note: LOD: limit of detection; U: unit of APE1 activity. “One-Step” indicates whether the entire assay can be performed in a single mixing step without separation or washing. “Cell Lysate” indicates successful detection in complex biological matrices. Detailed information of cited works is provided in the reference list.

**Table S4.** Intra-day repeatability of the biosensor for 1.0 U/mL APE1 (n = 5).

| Replicate | Fluorescence Intensity (a.u) | APE1 Concentration (U/mL) |
|-----------|------------------------------|---------------------------|
| 1         | 2450                         | 1.02                      |
| 2         | 2380                         | 0.98                      |
| 3         | 2420                         | 1.00                      |

| Replicate   | Fluorescence Intensity (a.u) | APE1 Concentration (U/mL) |
|-------------|------------------------------|---------------------------|
| 4           | 2510                         | 1.05                      |
| 5           | 2390                         | 0.99                      |
| <b>Mean</b> | 2430                         | 1.01                      |
| <b>SD</b>   | 102                          | 0.042                     |
| <b>RSD</b>  | 4.2%                         | 4.2%                      |

### Reference

- [S1] Liu Q, Zhang Q, Zhang Y, et al. A recognition-induced three-dimensional bipedal DNA walker for highly sensitive detection of APE1. *Analytical Methods*, 2024, 16(36): 6220-6228.
- [S2] Zhang L, Luo S, Fan R, et al. Localized Cas12a-based cascade amplification for sensitive and robust detection of APE1. *Talanta*, 2024, 280: 126773.
- [S3] Liu M, Tan Y, Zhou C, et al. Fluorogenic aptamer-based hybridization chain reaction for signal-amplified imaging of apurinic/aprimidinic endonuclease 1 in living cells. *Biosensors*, 2024, 14(6): 274.
- [S4] Li F, Xie Q, Qin Y, et al. Real-time monitoring and effector screening of APE1 based on rGO assisted DNA nanoprobe. *Analytical biochemistry*, 2021, 633: 114394.
- [S5] Ren Z, Zhang Q, Wang Y, et al. An “off-on” fluorescent sensor based on FRET and magnetic beads for APE1 activity detection in breast cancer cell lysates. *Analytical Methods*, 2026, 18(12): 2455-2463.
- [S6] Chai Q, Chen J, Zeng S, et al. Closed cyclic DNA machine for sensitive logic operation and APE1 detection. *Small*, 2023, 19(23): 2207736.
